# Supplementary material
Source: PubMed Central journal article supplement (PMC5508889)
Supplement: tpmd160540.SD1.pdf [file tpmd160540.SD1.pdf]

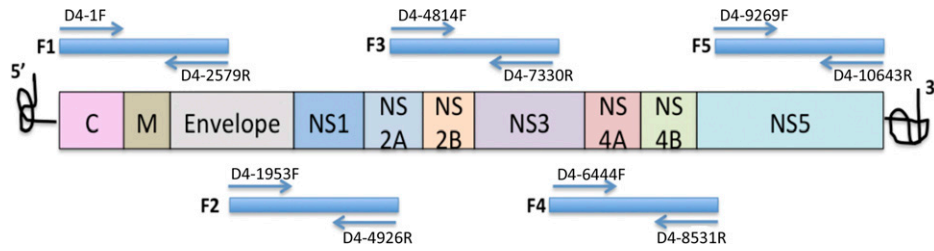

SUPPLEMENTAL FIGURE 1. Schematic diagram of how serotype-fragment-specific primer pairs align over complete dengue virus genome.

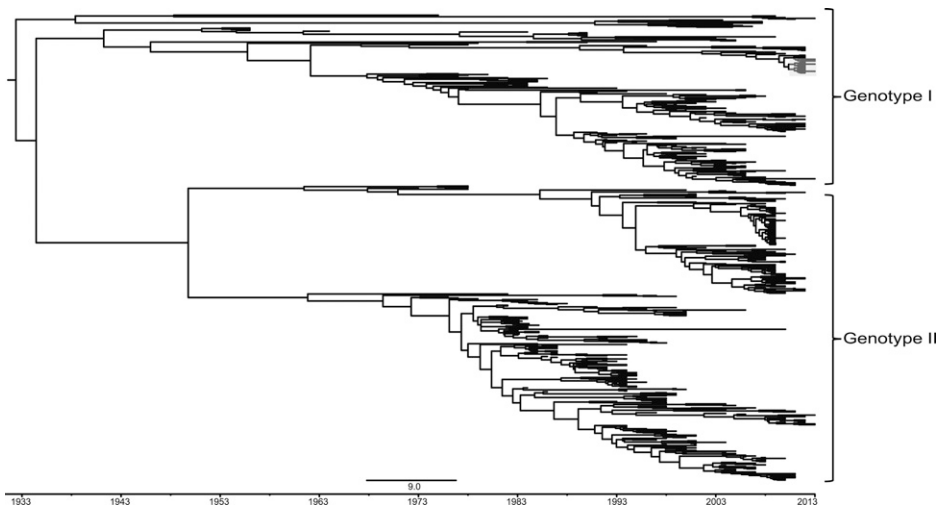

SUPPLEMENTAL FIGURE 2. Full temporally structured maximum clade credibility phylogenetic tree for dengue virus-4. Yellow highlight indicates samples from our cohort.

| Gene | JQ922560.1 | KF041260.1 | AY550909 | FJ225466 | FJ225467 | FJ225468 | FJ255469 | FJ225470 | FJ225471 |
|------|------------|------------|----------|----------|----------|----------|----------|----------|----------|
| 5'   | 0          | 0          |          |          |          |          |          |          |          |
|      | 0/0        | 0/0        |          |          |          |          |          |          |          |
| C    | 1-2        | 1-2        | 1-2      |          |          |          |          |          |          |
|      | 1.04/1     | 1.04/1     | 1.04/1   |          |          |          |          |          |          |
| prM  | 1-1        | 0          | 1-1      |          |          |          |          |          |          |
|      | 1/1        | 0/0        | 1/1      |          |          |          |          |          |          |
| M    | 0          | 0          | 1-1      | 1-1      | 1-1      | 0        | 0        | 0        | 0        |
|      | 0/0        | 0/0        | 1/1      | 1/1      | 1/1      | 0/0      | 0/0      | 0/0      | 0/0      |
| E    | 4-7        | 3-7        | 9-11     | 0*       | 0*       | 0*       | 0*       | 0*       | 0*       |
|      | 4.35/4     | 3.91/5     | 9.52/9   | 0*/0*    | 0*/0*    | 0*/0*    | 0*/0*    | 0*/0*    | 0*/0*    |
| NS1  | 2-6        | 1-1        |          |          |          |          |          |          |          |
|      | 2.74/2     | 1/1        |          |          |          |          |          |          |          |
| NS2A | 1-3        | 3-5        |          |          |          |          |          |          |          |
|      | 1.43/1     | 3.48/3     |          |          |          |          |          |          |          |
| NS2B | 1-6        | 0-2        |          |          |          |          |          |          |          |
|      | 1.48/1     | 0.26/0     |          |          |          |          |          |          |          |
| NS3  | 0-1        | 4-5        |          |          |          |          |          |          |          |
|      | 0.26/0     | 4.17/4     |          |          |          |          |          |          |          |
| NS4A | 1-5        | 0-2        |          |          |          |          |          |          |          |
|      | 1.22/1     | 0.35/0     |          |          |          |          |          |          |          |
| NS4B | 1-3        | 0-2        |          |          |          |          |          |          |          |
|      | 1.35/1     | 0.35/0     |          |          |          |          |          |          |          |
| NS5  | 3-17       | 1-18       |          |          |          |          |          |          |          |
|      | 4.65/3     | 2.57/2     |          |          |          |          |          |          |          |
| 3'   | 1-1        | 1-1        |          |          |          |          |          |          |          |
|      | 1/1        | 1/1        |          |          |          |          |          |          |          |

SUPPLEMENTAL FIGURE 3. Amino acid changes between current 23 Sri Lankan sequences and previous Sri Lankan sequences. There are two rows for each gene; the top indicates range of number of changes, the bottom is mean/median.

SUPPLEMENTAL TABLE 1  
PCR cycling parameters with serotype-fragment-specific primer pairs

| Fragment   | PCR primer pair       | Denaturing      | Melting         | Annealing        | Amplification      | Extension       |
|------------|-----------------------|-----------------|-----------------|------------------|--------------------|-----------------|
| DENV-4     | D4-1F*, D4-2579R*     | 95°C, 2 minutes | 95°C, 2 minutes | 50°C, 20 seconds | 72°C, 1:30 minutes | 72°C, 3 minutes |
| Fragment 1 | D4-9F, D4-2107R       | 95°C, 2 minutes | 95°C, 2 minutes | 50°C, 20 seconds | 72°C, 1:30 minutes | 72°C, 3 minutes |
| DENV-4     | D4-2065F, D4-4246R    | 95°C, 2 minutes | 95°C, 2 minutes | 50°C, 20 seconds | 72°C, 1:30 minutes | 72°C, 3 minutes |
| Fragment 2 | D4-1953F*, D4-4926R*  | 95°C, 2 minutes | 95°C, 2 minutes | 50°C, 20 seconds | 72°C, 1:30 minutes | 72°C, 3 minutes |
|            | D4-2968F, D4-4246R    | 95°C, 2 minutes | 95°C, 2 minutes | 50°C, 20 seconds | 72°C, 1:30 minutes | 72°C, 3 minutes |
|            | D4-2968F, D4-6463R    | 95°C, 2 minutes | 95°C, 2 minutes | 50°C, 20 seconds | 72°C, 1:30 minutes | 72°C, 3 minutes |
|            | D4-3836F, D4-6163R    | 95°C, 2 minutes | 95°C, 2 minutes | 50°C, 20 seconds | 72°C, 1:30 minutes | 72°C, 3 minutes |
|            | D4-3836F, D4-7349R    | 95°C, 2 minutes | 95°C, 2 minutes | 50°C, 20 seconds | 72°C, 1:30 minutes | 72°C, 3 minutes |
| DENV-4     | D4-4226F, D4-6463R    | 95°C, 2 minutes | 95°C, 2 minutes | 50°C, 20 seconds | 72°C, 1:30 minutes | 72°C, 3 minutes |
| Fragment 3 | D4-4814F*, D4-7330R*  | 95°C, 2 minutes | 95°C, 2 minutes | 50°C, 20 seconds | 72°C, 1:30 minutes | 72°C, 3 minutes |
|            | D4-5243F, D4-7537R    | 95°C, 2 minutes | 95°C, 2 minutes | 50°C, 20 seconds | 72°C, 1:30 minutes | 72°C, 3 minutes |
| DENV-4     | D4-6444F*, D4-8531R*  | 95°C, 2 minutes | 95°C, 2 minutes | 50°C, 20 seconds | 72°C, 1:30 minutes | 72°C, 3 minutes |
| Fragment 4 | D4-7224F, D4-9708R    | 95°C, 2 minutes | 95°C, 2 minutes | 50°C, 20 seconds | 72°C, 1:30 minutes | 72°C, 3 minutes |
| DENV-4     | D4-7911F, D4-10626R   | 95°C, 2 minutes | 95°C, 2 minutes | 50°C, 20 seconds | 72°C, 1:30 minutes | 72°C, 3 minutes |
| Fragment 5 | D4-8512F, D4-10626R   | 95°C, 2 minutes | 95°C, 2 minutes | 50°C, 20 seconds | 72°C, 1:30 minutes | 72°C, 3 minutes |
|            | D4-9269F*, D4-10643R* | 95°C, 2 minutes | 95°C, 2 minutes | 50°C, 20 seconds | 72°C, 1:30 minutes | 72°C, 3 minutes |

DENV = dengue virus; PCR = polymerase chain reaction.  
\* Primers previously published by Christenbury et al., 2010.

SUPPLEMENTAL TABLE 2  
List of sequencing primers used for full-genome sequence

| Serotype | Primer   | Sequence                                          |
|----------|----------|---------------------------------------------------|
| DENV-4   | d4a3*    | 5'-TGTGRAARTGGTGGGAGCAAAA-3'                      |
| DENV-4   | d4a8*    | 5'-ACYTGCCCTAATTGCTTTTCAAA-3'                     |
| DENV-4   | d4a14*   | 5'-TTGGTRAACYACTCCATTTCC-3'                       |
| DENV-4   | d4a18*   | 5'-GGGCATTYAATATTGCAGACGCTA-3'                    |
| DENV-4   | d4a5B*   | 5'-TTTGTCGGTCTGGGGGGGTATAGAACCCTGTTGGATCAACAAC-3' |
| DENV-4   | d4s1C*   | 5'-GATGAGGGGAAGATGGGGAGTTGTTAGTCTGTGTGGACCGAC-3'  |
| DENV-4   | d4s5*    | 5'-CTCCGTGTAAGTCCCCATAGAGA-3'                     |
| DENV-4   | d4s11*   | 5'-CCTMGCYATAGAACCAGGAAAAAATC-3'                  |
| DENV-4   | d4s16*   | 5'-AGRACAGCTGCTGGGATCATGA-3'                      |
| DENV-4   | d4s21*   | 5'-GAAAGACATYCCGCAGTGGGAA-3'                      |
| DENV-4   | d4s2*    | 5'-AACAAATGCACYCTYATTGCCA-3'                      |
| DENV-4   | d4s3*    | 5'-TTTGAAGTGCYAAAGACAACAGC-3'                     |
| DENV-4   | d4s4*    | 5'-TGGACAGCAGGAGCAGACACAT-3'                      |
| DENV-4   | d4s6*    | 5'-GYTCCATTGGCAAGATGTTTGAG-3'                     |
| DENV-4   | d4a2*    | 5'-AACYTGGTGYACAGCCTTTCCC-3'                      |
| DENV-4   | d4a4*    | 5'-CATGCTGTGTTTCTGCCATCTC-3'                      |
| DENV-4   | d4a6*    | 5'-TGGGTGTCTCCATTGTGGACTG-3'                      |
| DENV-4   | d4a7*    | 5'-TACATGACCCAGGTRGACGTGAG-3'                     |
| DENV-4   | d4s7*    | 5'-GTTGTGTGGYGTGATGGARTGG-3'                      |
| DENV-4   | d4s8*    | 5'-CATATGGATGAAATCCGAGAAGGA-3'                    |
| DENV-4   | d4s9*    | 5'-GGAGATTAGCCCTTGAGTGAAA-3'                      |
| DENV-4   | d4s10*   | 5'-CATTRGTCATGGCTTGGAGGACC-3'                     |
| DENV-4   | d4s12*   | 5'-GAAACTGGCRCTGATAACAGTRTCA-3'                   |
| DENV-4   | d4a9*    | 5'-TTTCCCRAAYAACCCTCTTTGC-3'                      |
| DENV-4   | d4a10*   | 5'-ACCAAACCCACAGCCATTATGC-3'                      |
| DENV-4   | d4a11*   | 5'-GAGRCCTCCYAGGATGATAGCAC-3'                     |
| DENV-4   | d4a12*   | 5'-ATGAGCATCTGRCTTCCAGCAC-3'                      |
| DENV-4   | d4a13*   | 5'-TCYTGTTDATGATRGGAGARCCAGA-3'                   |
| DENV-4   | d4a15*   | 5'-TATTGCAGACGCTAGYCTCGTG-3'                      |
| DENV-4   | d4s13*   | 5'-CTTSTAGTGTGCGRGTAGAGGATA-3'                    |
| DENV-4   | d4s14*   | 5'-TGCYCACTGGACAGAAGCAAGAT-3'                     |
| DENV-4   | d4s15*   | 5'-TAGGTGCTATGACAGCMGGYATCT-3'                    |
| DENV-4   | d4s17*   | 5'-ACCTTGACAGCATCCYTAGTCATG-3'                    |
| DENV-4   | d4a16*   | 5'-TCAATTGATTGTCTTGTGGGGTC-3'                     |
| DENV-4   | d4a17*   | 5'-CTTTCCCCTGTGAAGCACCAT-3'                       |
| DENV-4   | d4a19*   | 5'-TCAACTGGATHACTYTCTTTCCCG-3'                    |
| DENV-4   | d4a20*   | 5'-TTGTCTTTCCRGCTCCGGGGT-3'                       |
| DENV-4   | d4s18*   | 5'-GGTCBTATTACATGGCGACTCA-3'                      |
| DENV-4   | d4s19*   | 5'-GCACAAAGAAACCTGGCAYTATGA-3'                    |
| DENV-4   | d4s20*   | 5'-GGAATTTGAAGCCCTGGGTTTT-3'                      |
| DENV-4   | d4s22*   | 5'-AAAGACATYCCGCAGTGGGA-3'                        |
| DENV-4   | d4a21*   | 5'-CATCTGTTCTGTGATCAGTTCYTC-3'                    |
| DENV-4   | d4a22*   | 5'-ARCCAATTGGCTGTGCTGGT-3'                        |
| DENV-4   | d4a23*   | 5'-GARTTCTGGAYARCGGGCA-3'                         |
| DENV-4   | d4a24*   | 5'-CCATCTYTYAGGGCAGACTTGG-3'                      |
| DENV-4   | d4s23*   | 5'-GACAAGACTCCAGTCCATTCTGTG-3'                    |
| DENV-4   | d4a25*   | 5'-TTCCGATCAGRITTCCTGACCTG-3'                     |
| DENV-4   | D4F1-28F | 5'-GTCTGTGTGGACCGACAAGCACAG-3'                    |
| DENV-4   | D4F1-65F | 5'-GCTTGCTTAACACAGTTCTAACAG-3'                    |
| DENV-4   | D4-2387F | 5'-CCTCAATGGCAATGTCATGC-3'                        |
| DENV-4   | D4-3836F | 5'-CCATGACAACGGTGTCTTC-3'                         |
| DENV-4   | D4-6002F | 5'-GATGAAGATCATGCCACTG-3'                         |
| DENV-4   | D4-3532R | 5'-GTTTCTGATGTACCCTGTCC-3'                        |
| DENV-4   | D4-6163R | 5'-CTCTCCATCAATGGCTTGG-3'                         |
| DENV-4   | D4-8267R | 5'-CCATGGCTCCACCATCTTC-3'                         |
| DENV-4   | D4-9514R | 5'-GGTTATGCATGTCATCTCG-3'                         |

DENV = dengue virus.

\* Primers previously published by Christenbury et al., 2010. All other primers are unpublished primers or were designed specifically for this study.
